# Supplementary material for: Complex N-Glycans Are Important for Normal Fruit Ripening and Seed Development in Tomato
Source: PubMed Central journal article supplement (PMC7985349; doi:10.3389/fpls.2021.635962), 2021-03-09
Supplement: Data_Sheet_1.pdf [file Data_Sheet_1.pdf]

**A**

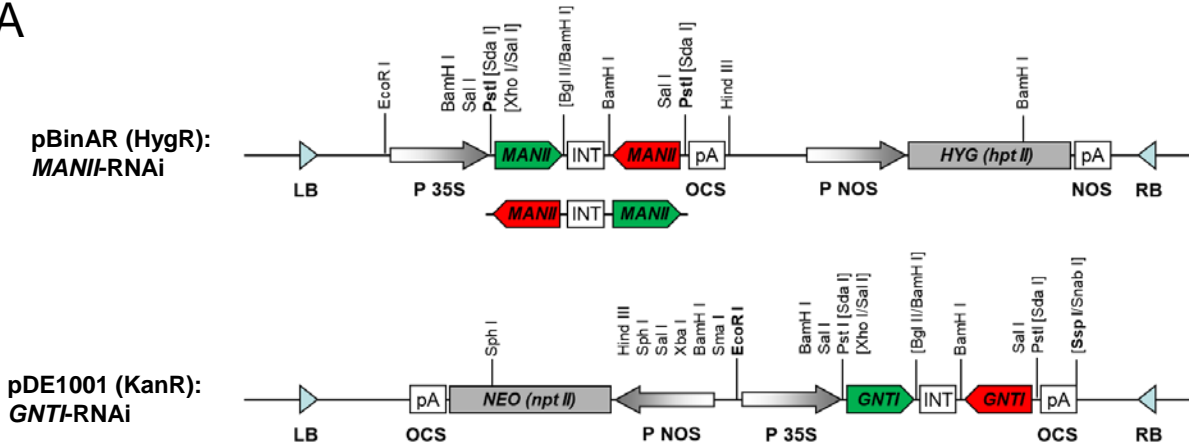

**B**

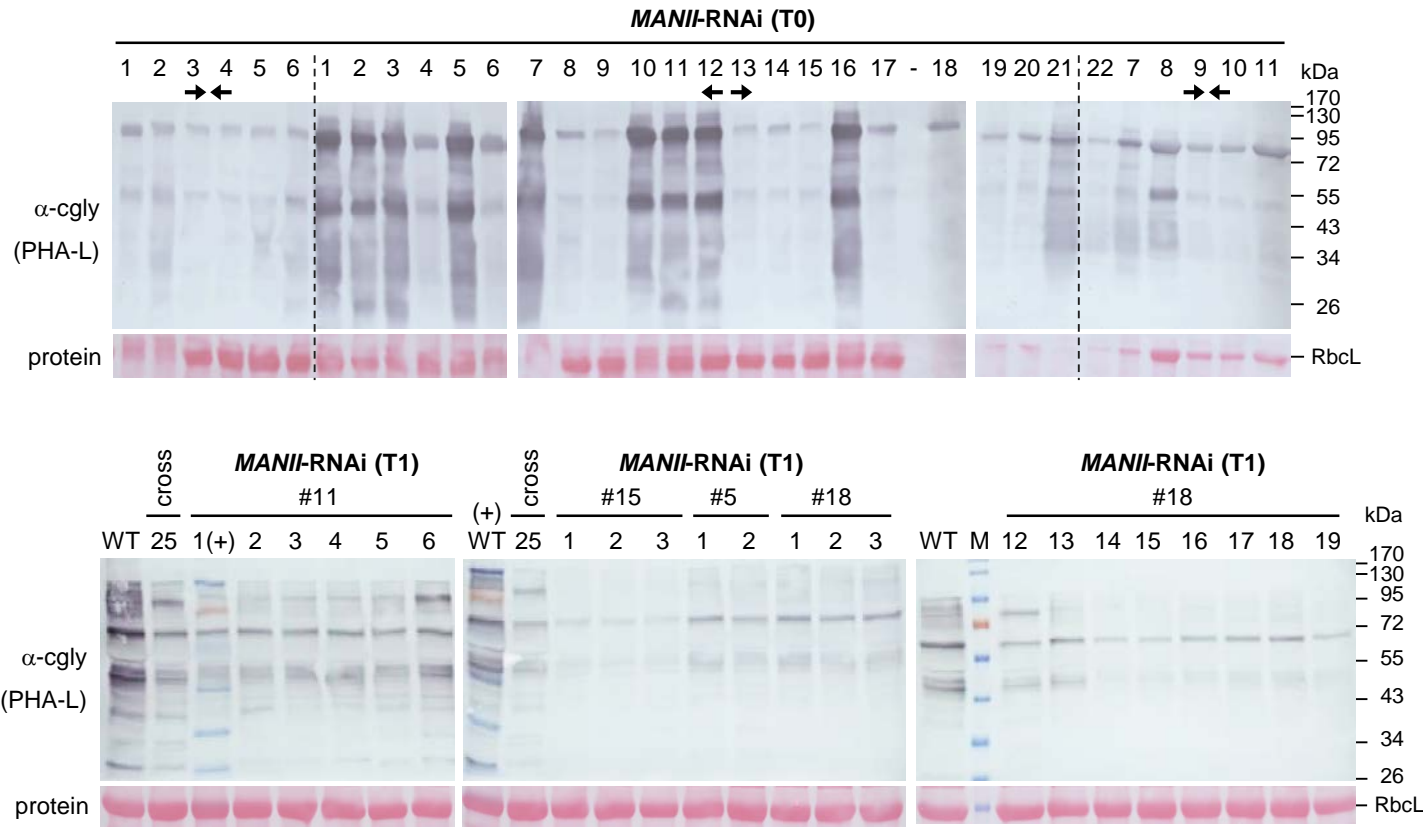

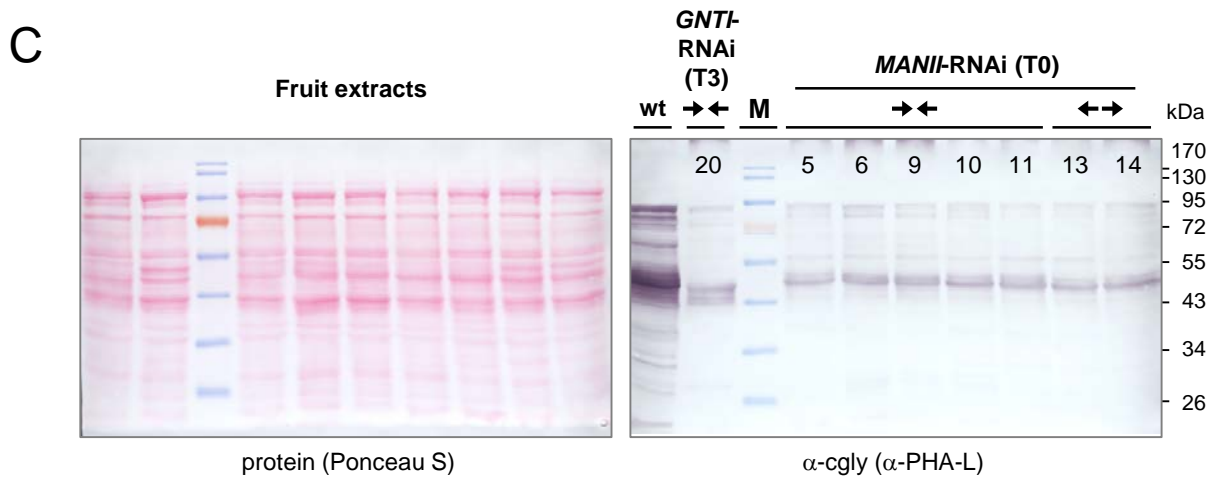

**Figure S1. Binary expression cassettes and analysis of Micro-Tom *MANII*-RNAi transformants.**

**A**, *MANII*-RNAi constructs with opposite orientation of the sense and antisense fragments relative to the intron (INT) were assembled in pUC-RNAi. The PstI fragment (bold) was inserted into SdaI-opened binary vector pBinAR (HygR) and used for *Agrobacterium*-mediated transformation of Moneymaker Micro-Tom. The sense-intron-antisense construct was also used for *MANII* suppression in *N. benthamiana*. For *GNTI*, a similar region previously used for tomato *GNTI*-RNAi (Kaulfürst-Soboll et al. 2011a) was amplified from *Nicotiana tabacum* SNN clone A9 (Wenderoth and von Schaewen 2000) and assembled in pUC-RNAi. The EcoRI/SspI fragment (bold) was inserted into EcoRI/SnaBI-opened binary vector pDE1001 (KanR) and used for *Agrobacterium*-mediated *N. benthamiana* transformation. LB/RB, left/right T-DNA border. Hpt/npt, hygromycin (HYG)/neomycin (NEO) phosphotransferase; OCS/NOS, Octopine/Nopaline synthase; P, promoter; 35S, constitutive promoter of Cauliflower Mosaic Virus (CaMV); pA polyadenylation signal.

**B**, Immunoblot analysis (colorimetric development) of leaf extracts (primary transformants, T0; progeny of selected lines, T1), expressing the indicated RNAi constructs. Cross: *GNTI*-RNAi x *vINV*-RNAi; (+) with Marker (M); RbcL: Large subunit of Ribulose-bisphosphate carboxylase/oxygenase (Rubisco).

**C**, Immunoblot analysis of fruit extracts from selected primary transformants (T0), expressing the indicated RNAi constructs.

**B-C**, Blotted extracts were developed colorimetrically (as described in Wenderoth and von Schaewen, 2000) with a complex glycan antiserum ( $\alpha$ -cgly) raised against bean lectin PHA-L (mainly binding to  $\beta$ 1,2-xylose but also core  $\beta$ 1,3-fucose residues) in rabbits. Compared to wild-type (wt), both *MANII*-RNAi constructs (A, sense = green, antisense = red fragment orientations, indicated by arrows) led to similar reduction of cgly recognition as in *GNTI*-RNAi (T3). The Ponceau S-stained blots (protein) are shown as loading reference. Apparent molecular masses are indicated in kDa (PageRuler Prestained Protein Ladder, Fermentas).

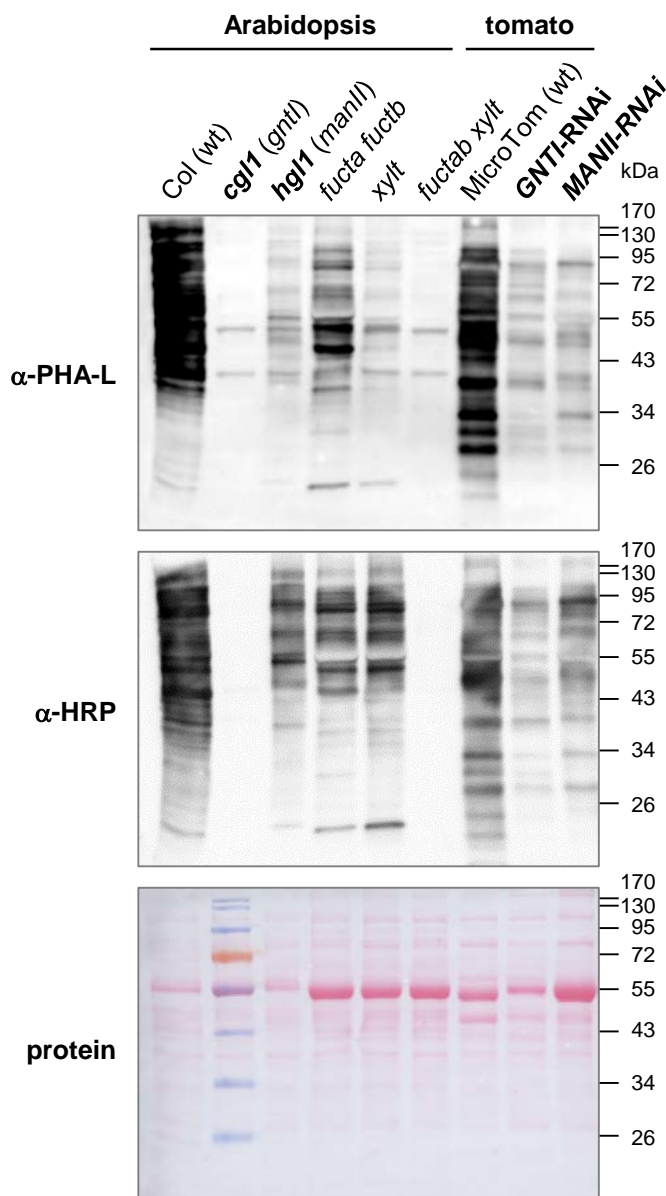

**Figure S2. Comparison of Arabidopsis mutant to tomato RNAi plants.**

Leaf extracts of Arabidopsis wild-type (Col) and different complex glycan mutants side-by-side with tomato Micro-Tom wild-type (wt), GNTI-RNAi (#20) and MANII-RNAi (#14). The blot was developed with two complex glycan (cgly) antisera. First with  $\alpha$ -PHA-L (anti-Phytohemagglutinin-L), and after stripping with  $\alpha$ -HRP (anti-horseradish peroxidase), both vacuolar glycoproteins. Note that cgly detection of MANII-RNAi is comparable to the Arabidopsis *hgl1* (*man1*) mutant). The Ponceau S-stained blot (protein) is shown as loading reference. Apparent molecular masses are indicated in kDa (PageRuler Prestained Protein Ladder, Fermentas).

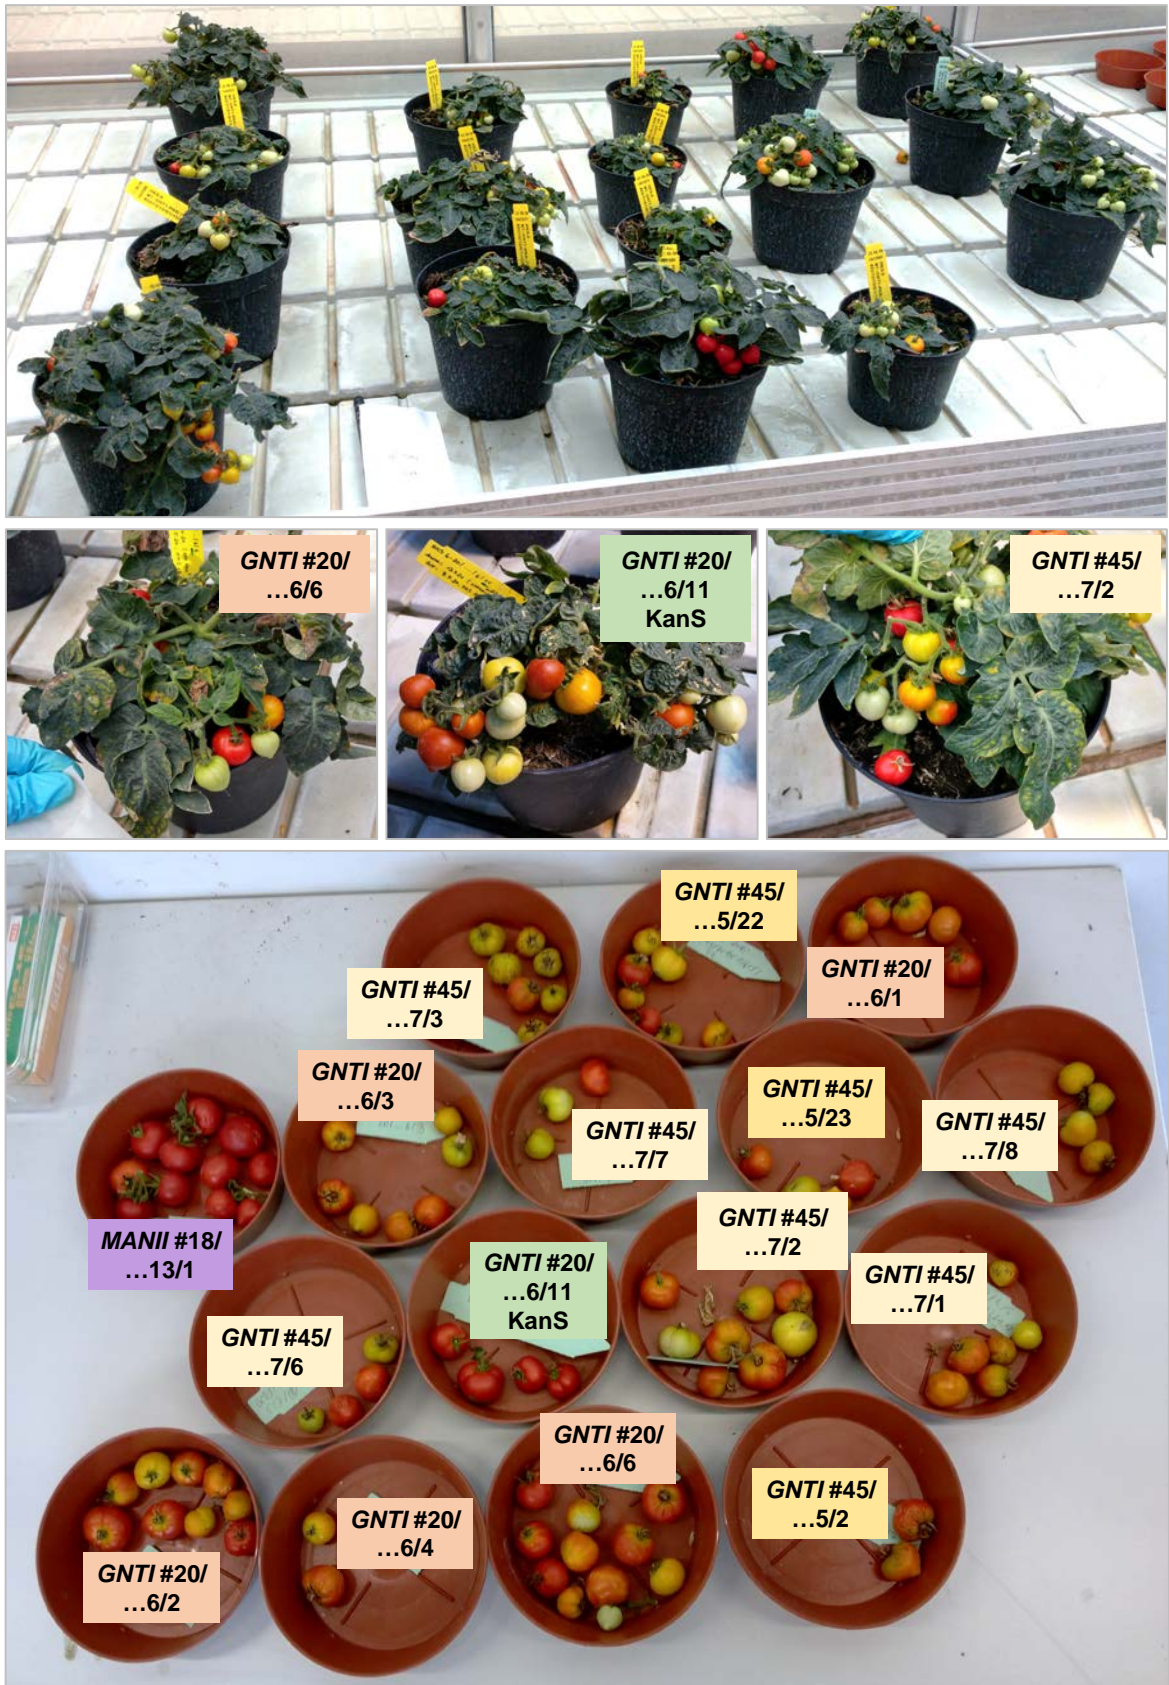

**Figure S3A. Micro-Tom RNAi plants in the greenhouse and harvested fruits of different lines.** Note that fruits of a Kanamycin-sensitive sibling in line #20 (green label) ripen regularly (pseudo wild-type).

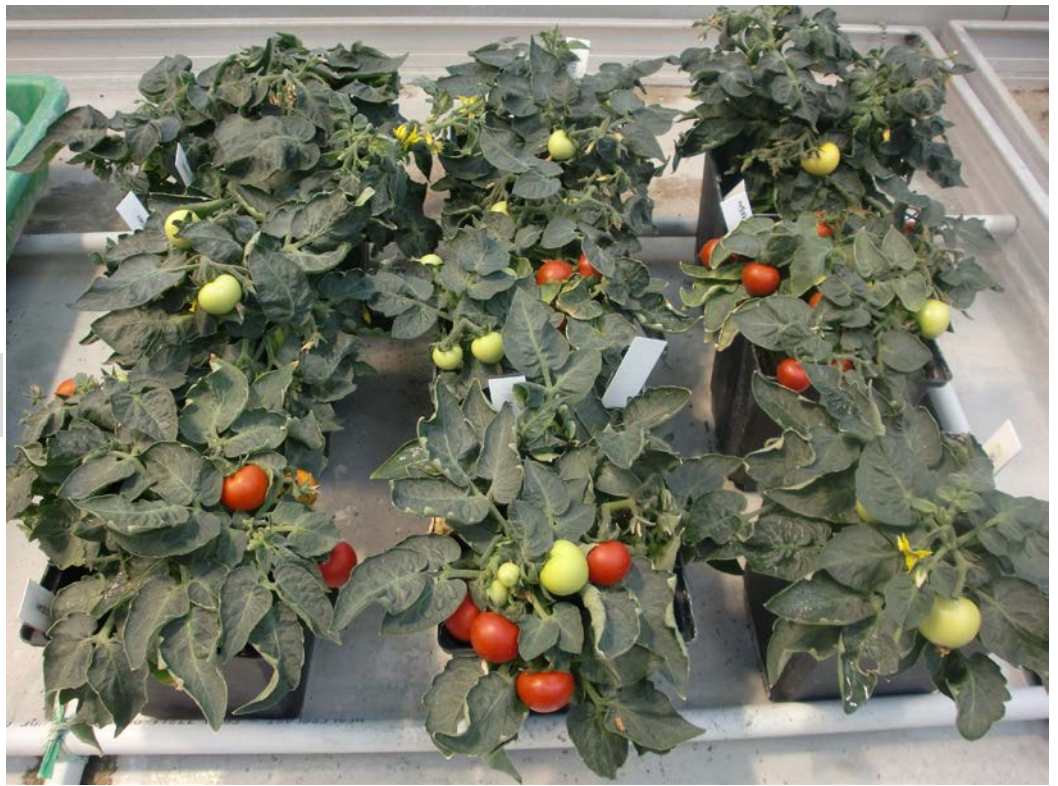

**MANI-RNAi  
#14 (T4)**

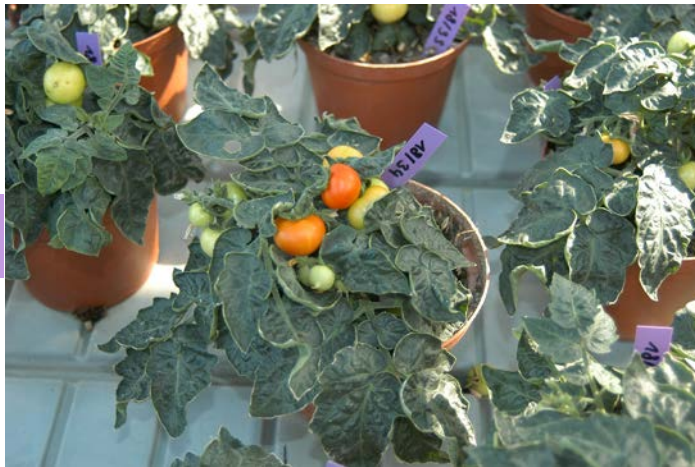

**MANI-RNAi  
#18 (T1)**

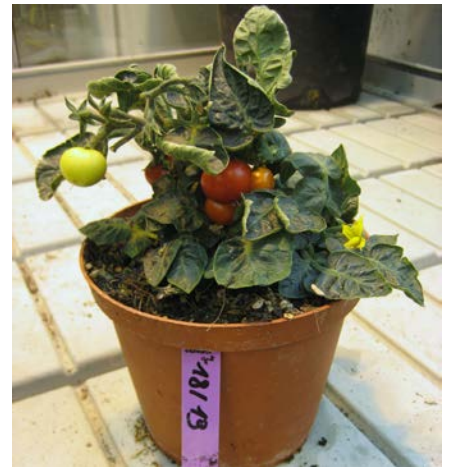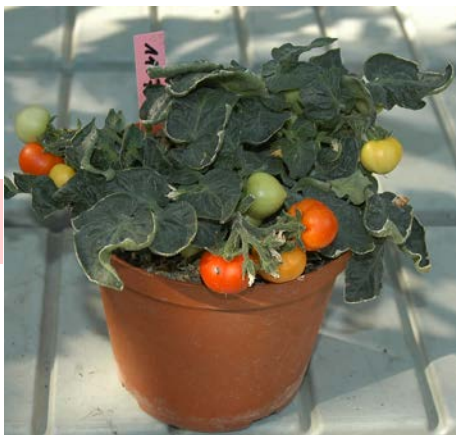

**MANI-RNAi  
#11 (T1)**

**MANI-RNAi  
#15 (T1)**

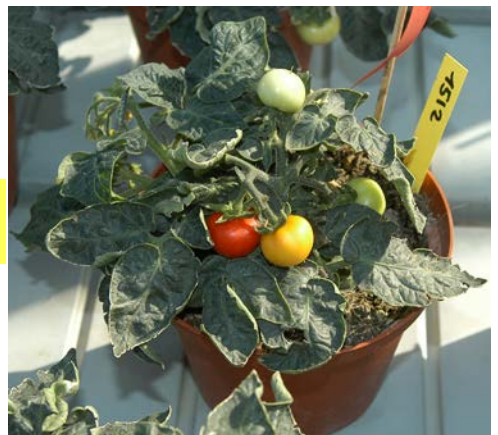

**Figure S3B. Different *MANI*-RNAi lines with fruits in the greenhouse.**

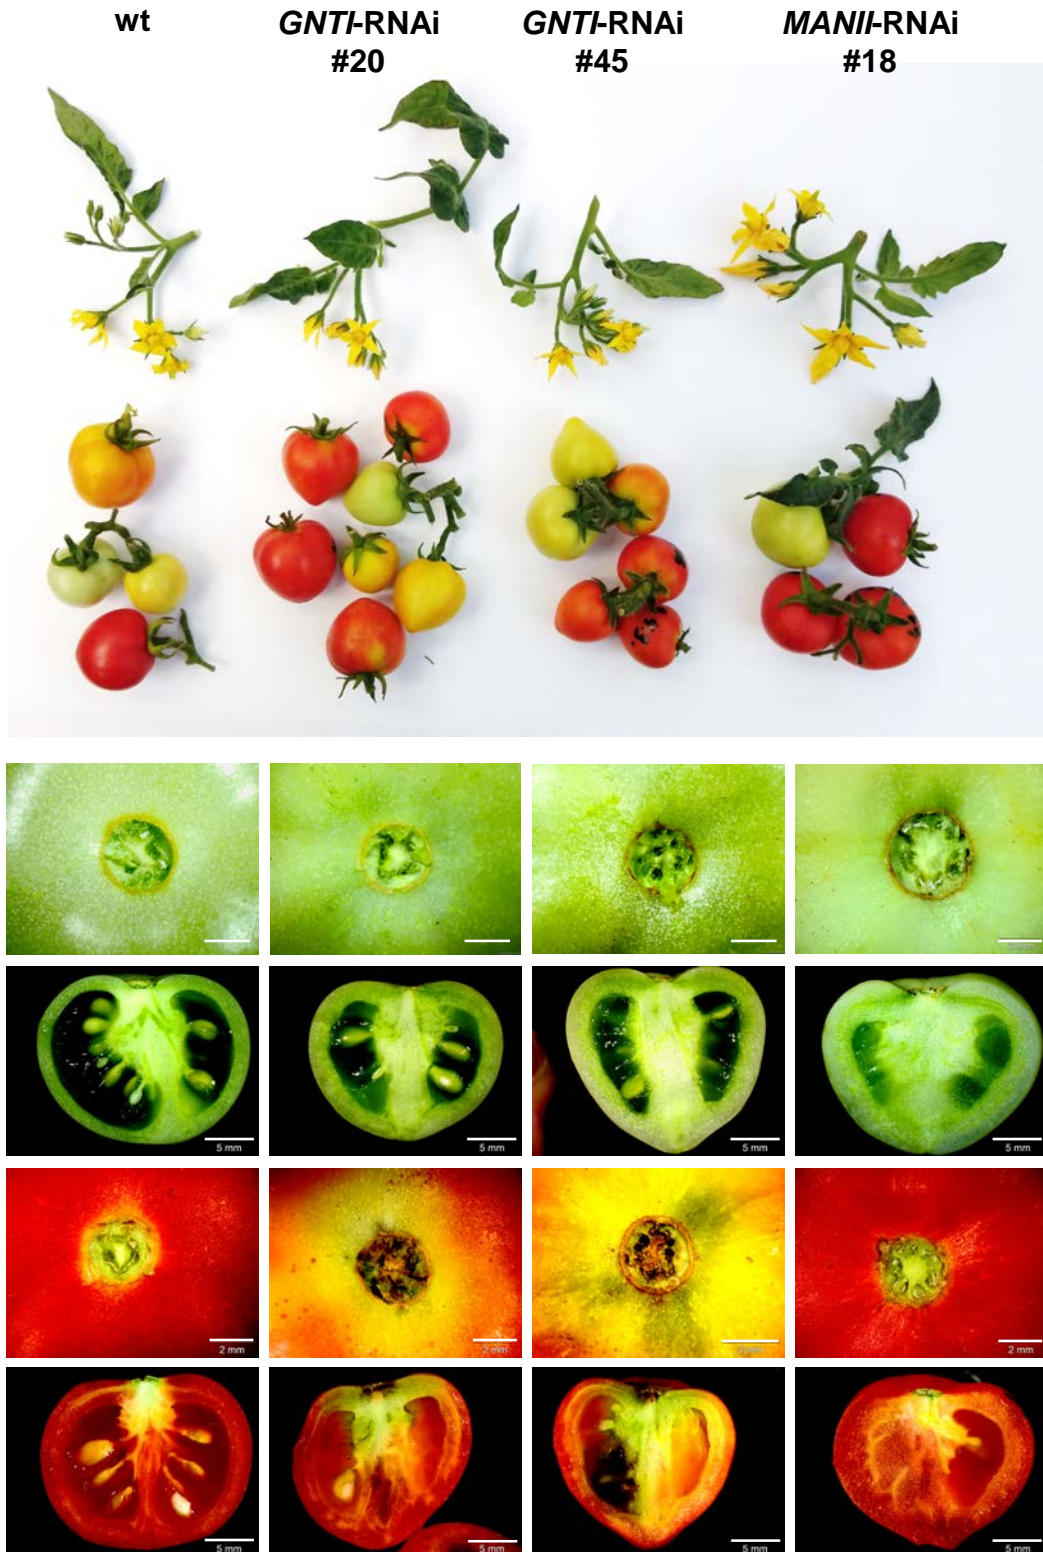

**Figure S3C. Details of tomato Micro-Tom flowers, fruits, and fruit-attached regions.**

Flowers and fruits were harvested from Micro-Tom wild-type (*wt*), two *GNTI-RNAi* lines and *MANII-RNAi* plants in the greenhouse. Details were photographed with a computer-assisted binocular. Bars represent 2 mm for fruit-attachment zones and 5 mm for fruit halves. Note the differences in size, seed number and pericarp thickness for fruits of the different genotypes.

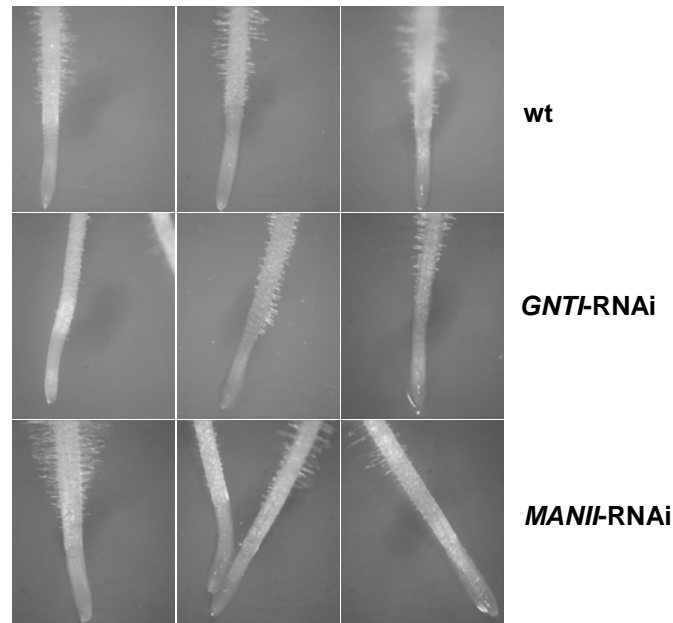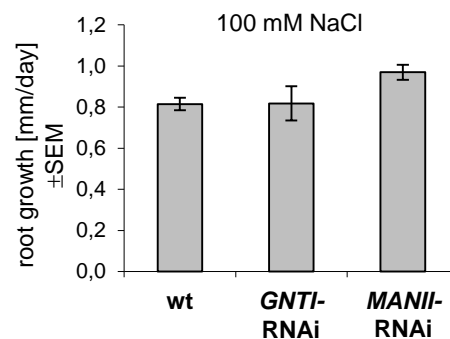

**Figure S4. Root growth analysis of Micro-Tom seedlings.**

Seeds of Micro-Tom wild-type (wt), *GNTI*-RNAi (#20) and two *MANII*-RNAi lines (#11, #14) were surface-sterilized and placed on MS agar containing 100 mM NaCl. To determine the increment of root growth, seedlings were photographed after 3 and 7 days of vertical growth in a climate chamber (long day regime). The diagram represents growth per day (in mm)  $\pm$  SEM (standard error of the mean). wt, n=10; *GNTI*-RNAi, n=7; *MANII*-RNAi, n=14.

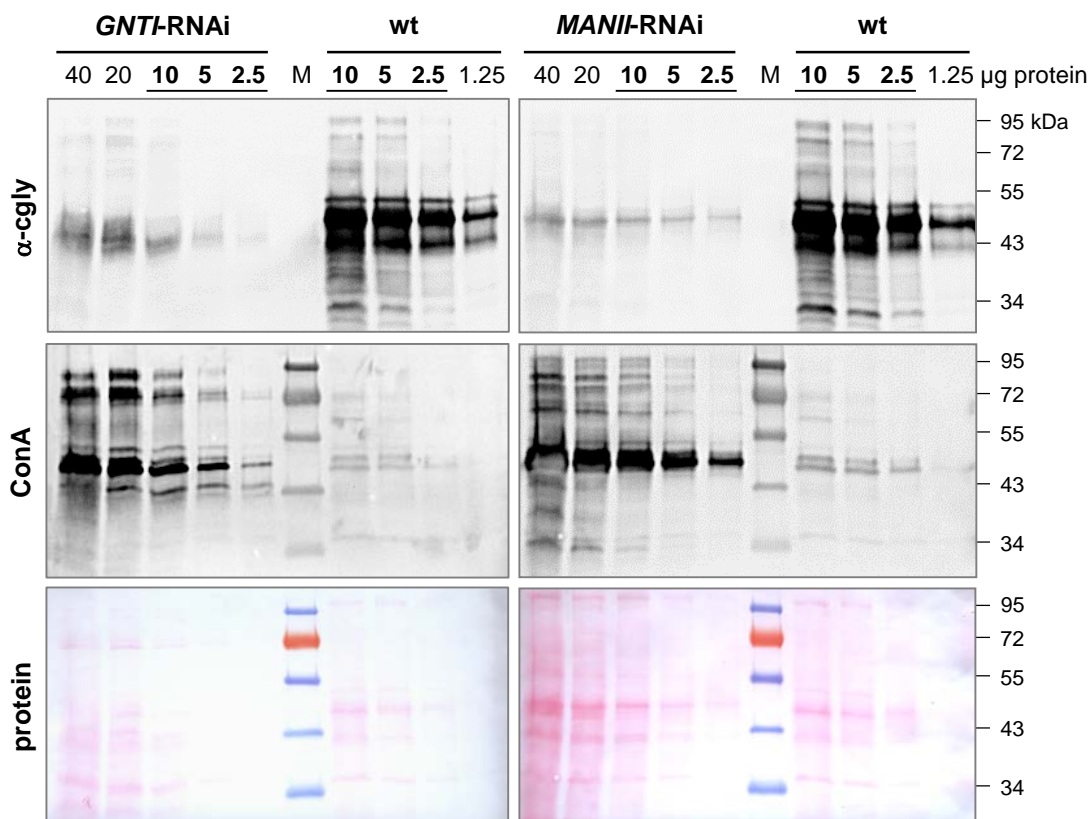

**Figure S5. Extent of complex glycan reduction in fruits of *Micro-Tom* RNAi plants.**

Protein amounts were determined with the Bradford assay in fruit extracts of comparable ripeness (Figure 2, grey stars) and serially diluted prior to immunoblot analysis. After complex glycan detection ( $\alpha$ -cgly with  $\alpha$ -PHA-L antiserum, top) the blot was stripped and developed with the lectin Concanavalin A (ConA) that binds to terminal mannose residues. Note that both *GNTI*-RNAi (#20) and *MANII*-RNAi (#6) result in about 50-times reduced cgly and inversely increased mannose detection. The Ponceau S-stained blots (protein) are shown as loading reference. Apparent molecular masses are indicated in kDa (PageRuler Prestained Protein Ladder, Fermentas).



Supports Figure 5

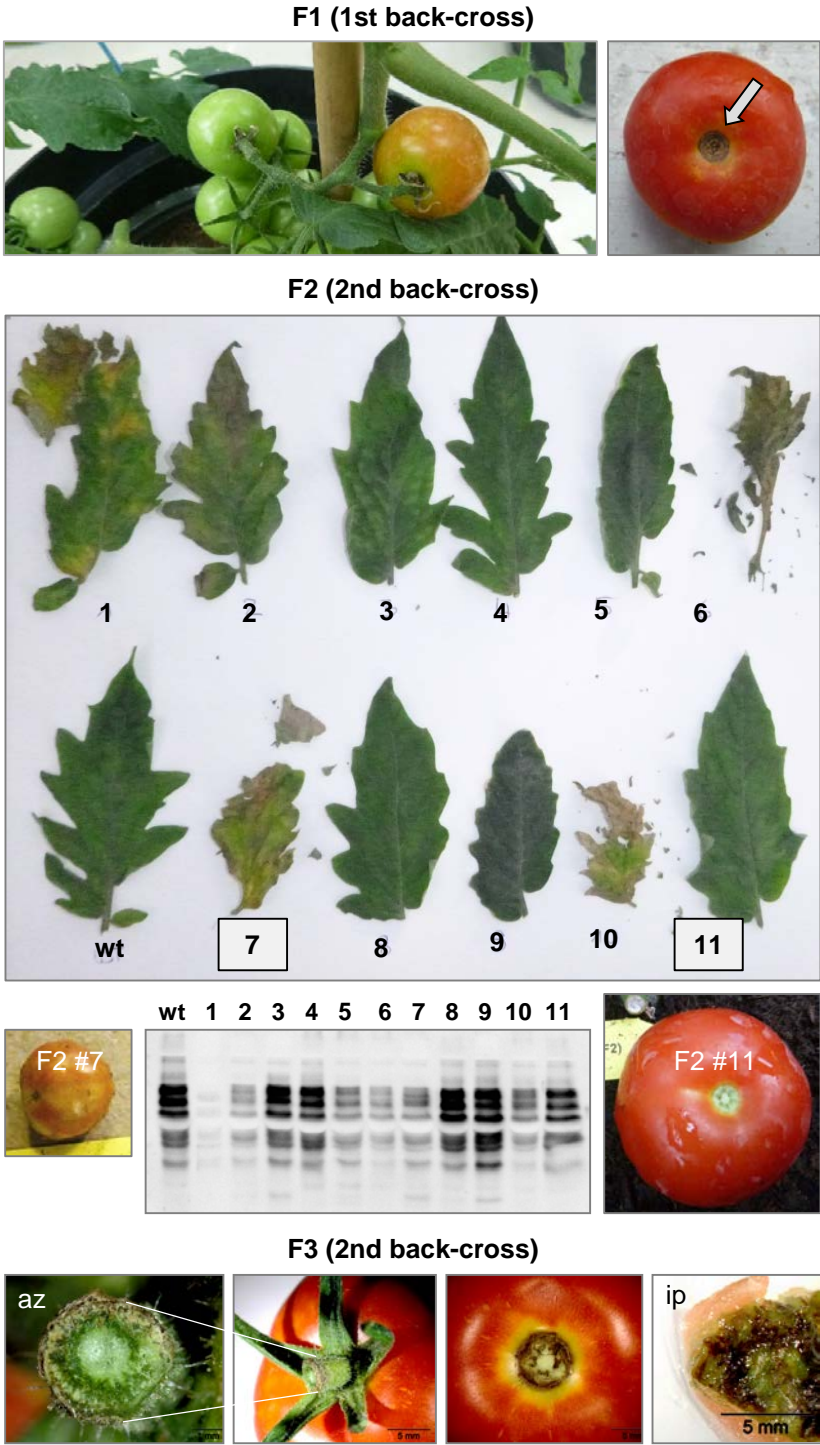

**Figure S6. *GNT1*-RNAi leaf and fruit phenotypes persist after back-crossing.**

Moneymaker wild-type served as mother plant for two consecutive back-crosses with Micro-Tom *GNT1*-RNAi line #20. F1 plants of the first back-cross developed incompletely ripe fruits with necrotic stalk-attached region (top right, arrow). F1 flowers were pollinated with Moneymaker wt (2nd back-cross). Resulting F2 plants showed segregating leaf and fruit phenotypes that correlated with complex glycan reduction ( $\alpha$ -cgly blot, center), e.g. F2 #7 with necrotic leaf lesions (and signs of bacterial infection) produces small patchy fruits (left), but F2 #11 wild-type like leaves and fruits (right). Bottom, necrosis at the pedicel abscission zone (az) and fruit-attached region (ip, inner part) in the F3.

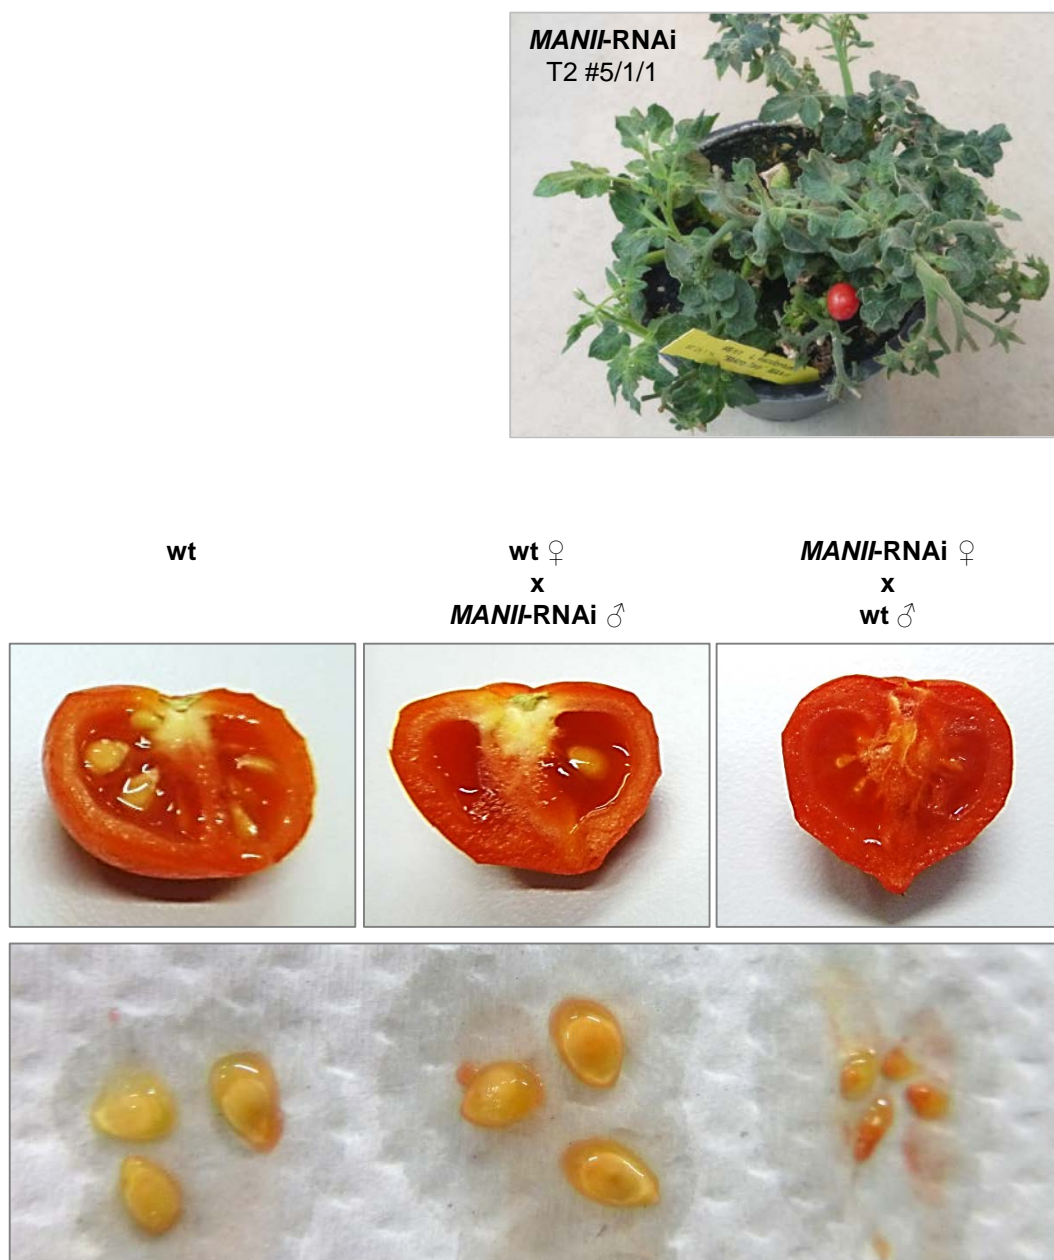

**Figure S7. *MANII*-RNAi plants could not be propagated by back-crossing.**

A *MANII*-RNAi transformant that produced only few seeds (#5, T2) was reciprocally crossed with Micro-Tom wild-type (wt). When *MANII*-RNAi served as pollen donor, normal looking seeds were obtained, but much smaller seeds when *MANII*-RNAi served as mother plant. Among the normal-looking seeds (of the cross with wt as mother plant) no resistant offspring was found, supporting fertilization problems of *MANII*-RNAi plants (selfed, compare Figure 5).

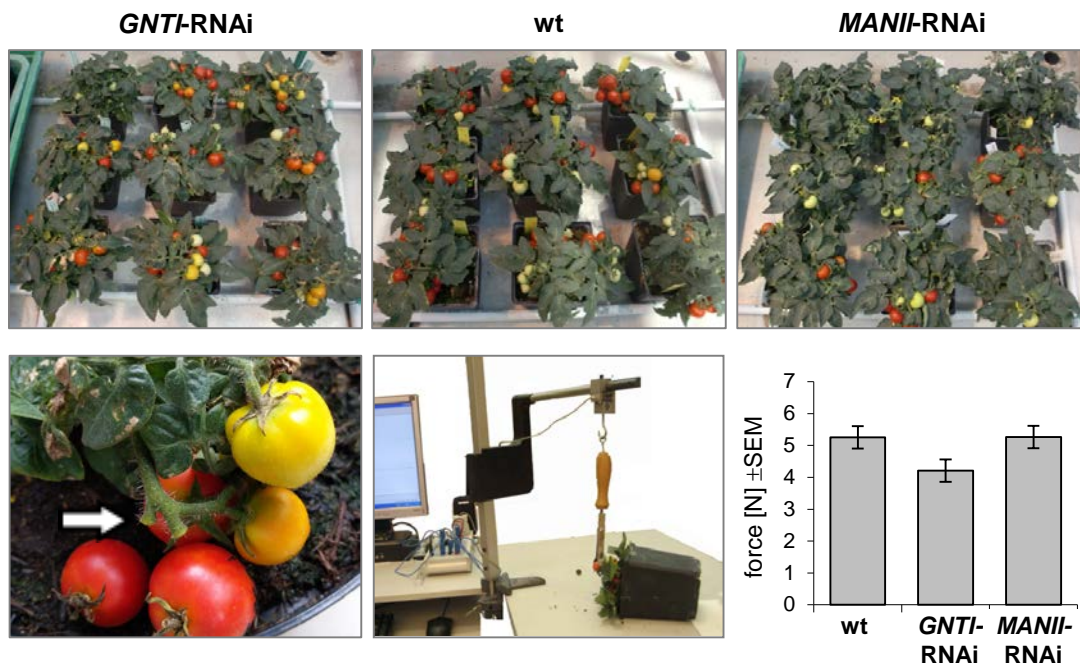

**Figure S8. Fruits of *GNTI*-RNAi plants are released at lower pulling forces.**

Micro-Tom plants in the greenhouse (3 months old) were used for measuring the force needed to pick a fruit. An example of early fruit drop (arrow) and experimental set-up with computer-assisted dynamometer is shown below. Red fruits of wild-type (wt), *GNTI*-RNAi (#20) and *MANII*-RNAi (#14) plants were pulled in longitudinal direction (relative to the stalk axis) and the resulting forces plotted, N, Newton; SEM, standard error of the mean (n = 18).

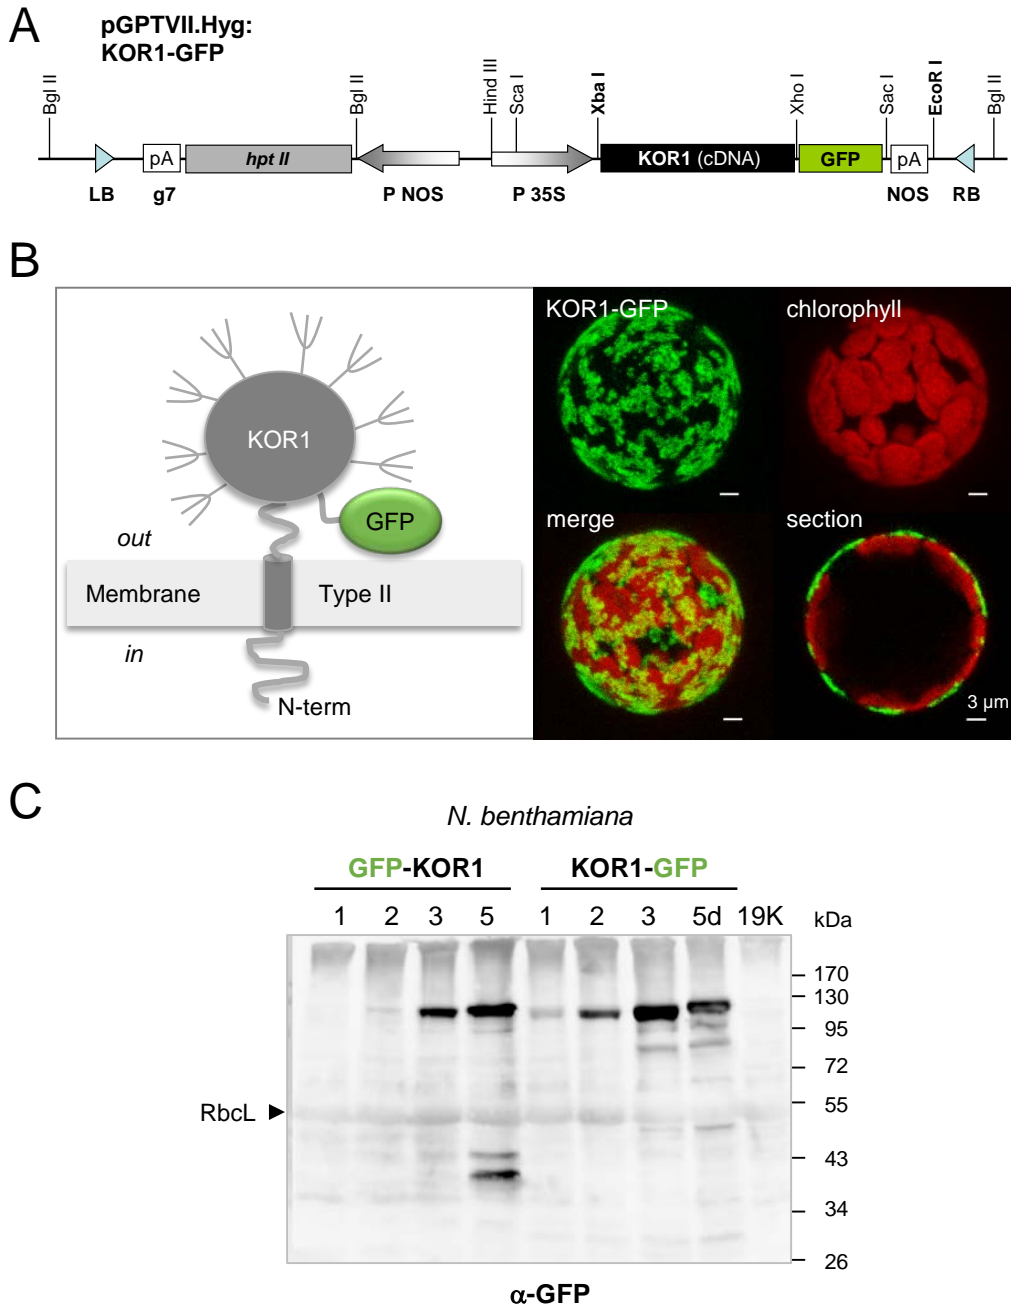

**Figure S9. Generation of a binary KOR1-GFP reporter construct with labelled ectodomain.**

**A**, Scheme of the binary KOR1-GFP construct (expression cassette, for abbreviations see Figure S1).

**B**, Type-II membrane topology with labeled *N*-glycosylated KOR1 ectodomain (left). The localization pattern of KOR1-GFP in tobacco protoplasts (right) resembles that of GFP-KOR1 (von Schaewen et al. 2015).

**C**, Agroinfiltration of *N. benthamiana* leaves with GFP-KOR1 and KOR1-GFP binary constructs. Immunoblot analysis of whole leaf extracts (Frank et al., 2008) with anti-GFP antibodies ( $\alpha$ -GFP) show similar expression over a 5-day time course. Note the slightly different degradation products when GFP is fused to the *N*-glycosylated KOR1 ectodomain. 19K, co-expressed *Agrobacterium* silencing suppressor strain (control). RbcL, Large subunit of Ribulose-bisphosphate carboxylase/oxygenase. Apparent molecular masses are indicated in kDa (PageRuler Prestained Protein Ladder, Fermentas).
